# Supplementary material for: Identification of protein clusters predictive of tumor response in rectal cancer patients receiving neoadjuvant chemo-radiotherapy
Source: PubMed Central journal article supplement (PMC5438653; doi:10.18632/oncotarget.16053), 2017-03-09
Supplement: oncotarget-08-28328-s001.pdf [file oncotarget-08-28328-s001.pdf]

# Identification of protein clusters predictive of tumor response in rectal cancer patients receiving neoadjuvant chemo-radiotherapy

## Supplementary Materials

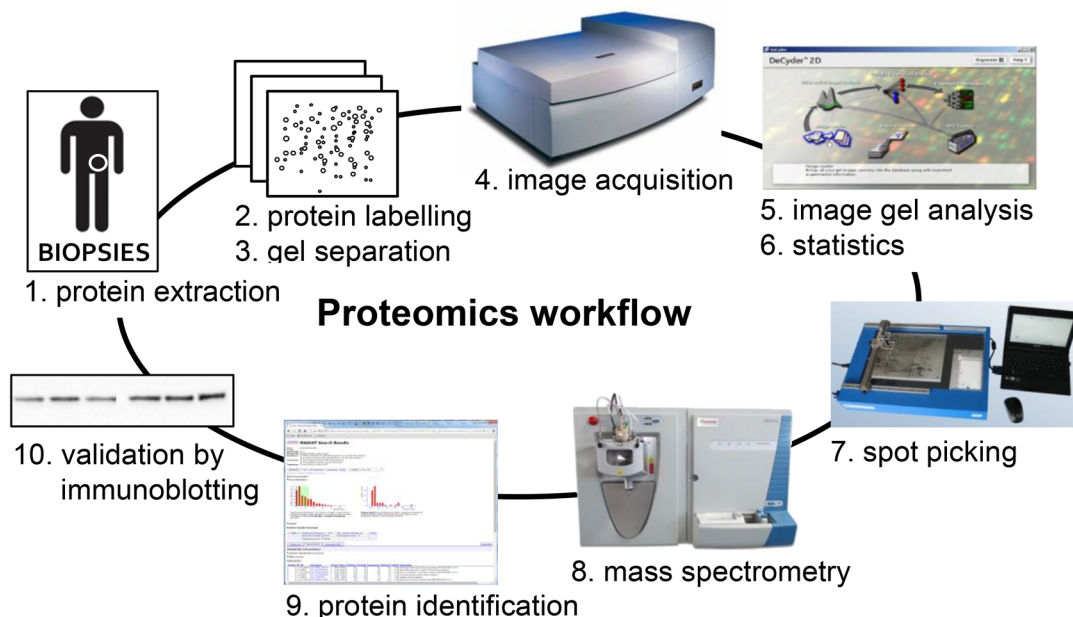

**Supplementary Figure 1: A schematic illustration of the proteomic workflow adopted.** Proteins have been extracted from both rectal cancer (T) and the healthy normal tissue (N) biopsies of 15 patients (1). After labelling (2), proteins were separated by first and second dimension (3). Gel images were acquired (4) and analysed with a dedicated software (5), which allowed to detect and statistically analyse the differentially expressed spots in 'TRG 1-2' group *versus* either 'TRG 3' or 'TRG4'. These spots of interest were excised from a preparative gel (7), digested with trypsin and separated by mass spectrometry (8). For each spot, MS/MS spectra were searched against sequence database to get protein identification(s) (9). The differential expression of some identified proteins of interest was validated by immunoblotting (10). Details are explained in Methods section.

**A**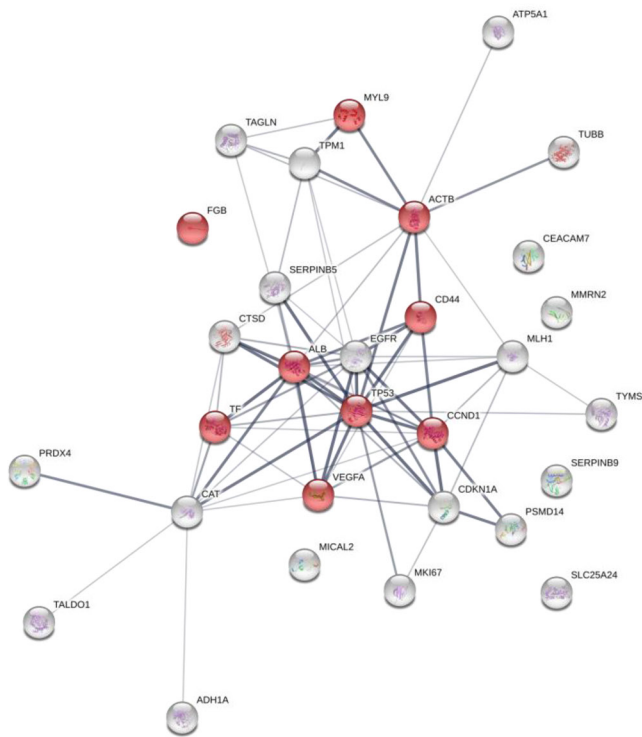**B**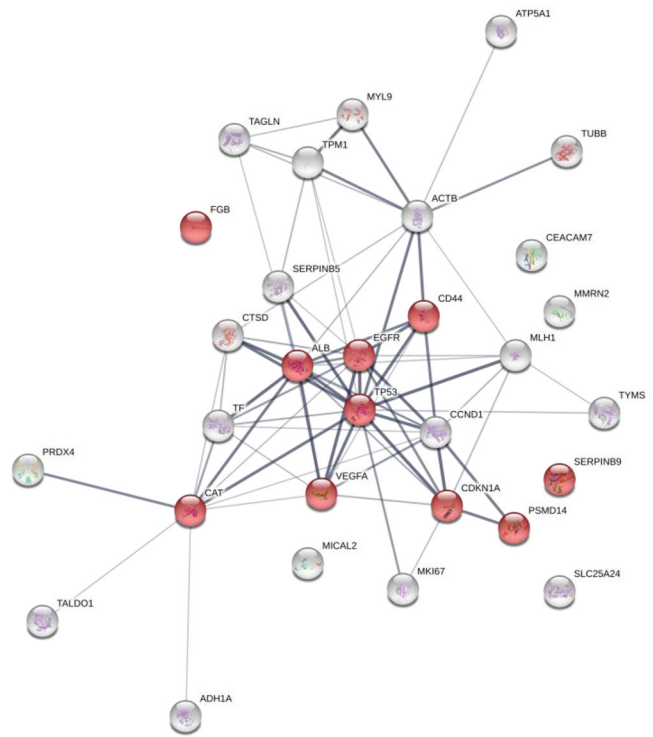

**Supplementary Figure 2: Protein-protein interaction maps of the overexpressed protein spots in rectal cancers of poor responders (TRG3 and TRG4) before therapy together with some key proteins known to be candidate biomarkers responsive to neoadjuvant CRT.** The interaction map is illustrated as confidence view, where the thickness of the connecting lines indicates the level of confidence. Stronger associations are represented by thicker lines. Each circle represents a protein. Panels visualize in red proteins involved in 'platelet activation' (A) and 'negative regulation of apoptosis' (B). The STRING tool (<http://string-db.org>) was used to make the networks and analyse the biological processes.

**Supplementary Table 1: Clinicopathological characteristics of patients affected by rectal cancer of median and distal localization, accordingly to the criteria for the nCRT [21]**

| Patient nr. | Sex | Age | Pre-CRT stage TNM | TRG | TRG group of analysis |
|-------------|-----|-----|-------------------|-----|-----------------------|
| 1           | M   | 74  | T3                | 1   | 1-2                   |
| 2           | M   | 78  | T2N0              | 1   |                       |
| 3           | M   | 61  | T3N0              | 1   |                       |
| 4           | F   | 60  | T3N0              | 1   |                       |
| 5           | M   | 64  | T3N+              | 1   |                       |
| 6           | M   | 55  | T3N0              | 1   |                       |
| 7           | M   | 63  | T3N+              | 1   |                       |
| 8           | M   | 49  | T3N+              | 1   |                       |
| 9           | F   | 57  | T3N+              | 1   |                       |
| 10          | F   | 60  | T3N0              | 2   |                       |
| 11          | M   | 73  | T3N+              | 2   |                       |
| 12          | F   | 75  | T3N0              | 2   |                       |
| 1           | F   | 49  | T3/4N+            | 3   | 3                     |
| 2           | M   | 70  | T3N0              | 3   |                       |
| 3           | F   | 78  | T3N0              | 3   |                       |
| 4           | M   | 43  | T2N0              | 3   |                       |
| 5           | F   | 65  | T3N0              | 3   |                       |
| 1           | M   | 78  | T3N+              | 4   | 4                     |
| 2           | F   | 77  | T3N+              | 4   |                       |
| 3           | M   | 48  | T3N+              | 4   |                       |

Pathological responses were evaluated with the tumor regression grade (TRG) system. Their biopsies were used as independent validation set for fibrinogen beta protein, as described in 'Material and methods' section.

**Supplementary Table 2: Identification of differentially expressed spots rectal cancer by mass spectrometry.** See Supplementary\_Table\_2

**Supplementary Table 3: List of 9 biological processes ( $p$ -value\_fdr < 0.05) related to all the differential proteins (both up- and down-regulated) found in tumor regression groups 'TRG 1-2' versus 'TRG 3' or 'TRG 4' of rectal cancer**

| GO_id      | Term                   | Number of proteins | $p$ -value_fdr |
|------------|------------------------|--------------------|----------------|
| GO:0030168 | platelet activation    | 6                  | 3.58E-03       |
| GO:0002576 | platelet degranulation | 4                  | 2.27E-02       |
| GO:0042060 | wound healing          | 7                  | 3.55E-02       |
| GO:0070527 | platelet aggregation   | 3                  | 3.55E-02       |
| GO:0009611 | response to wounding   | 7                  | 4.32E-02       |
| GO:0007596 | blood coagulation      | 6                  | 4.70E-02       |
| GO:0050817 | coagulation            | 6                  | 4.70E-02       |
| GO:0007599 | hemostasis             | 6                  | 4.70E-02       |
| GO:0001775 | cell activation        | 6                  | 9.09E-02       |

Biological processes were analysed with STRING (GO, Gene Ontology).
